# Supplementary material for: Improved systematic tRNA gene annotation allows new insights into the evolution of mitochondrial tRNA structures and into the mechanisms of mitochondrial genome rearrangements
Source: PubMed Central journal article supplement — Nucleic Acids Res. 2011 Dec 1;40(7):2833–45. doi: 10.1093/nar/gkr1131 (PMC3326299; doi:10.1093/nar/gkr1131), 2011-12-01
Supplement: supp_gkr1131_nar-02253-n-2011-File014.pdf [file supp_gkr1131_nar-02253-n-2011-File014.pdf]

**A) Newly identified tRNA genes in mitochondrial genomes and misannotations in comparison to genes of closely related organisms**

**mt-tRNA<sup>Ala</sup>**

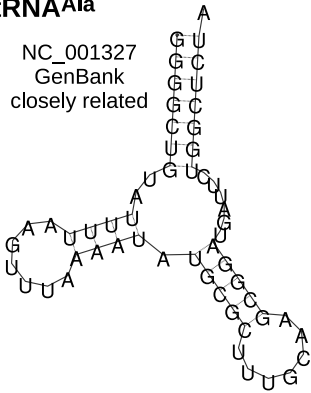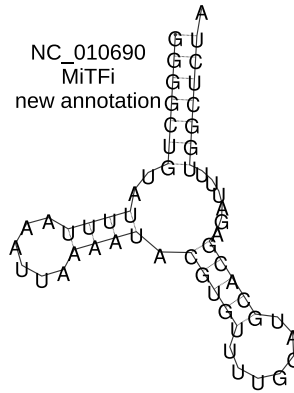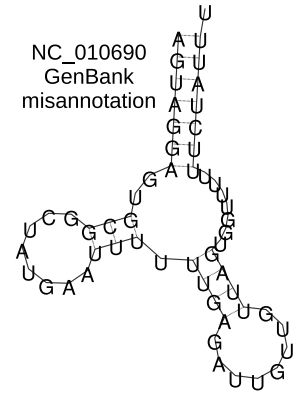

**mt-tRNA<sup>Ile</sup>**

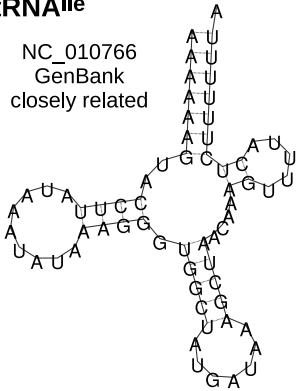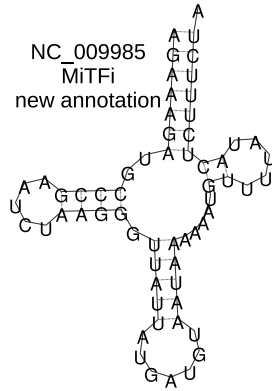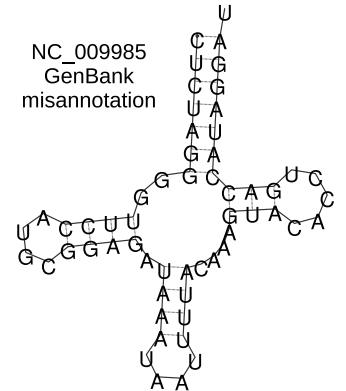

**mt-tRNA<sup>Val</sup>**

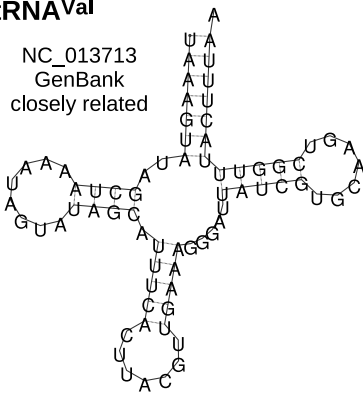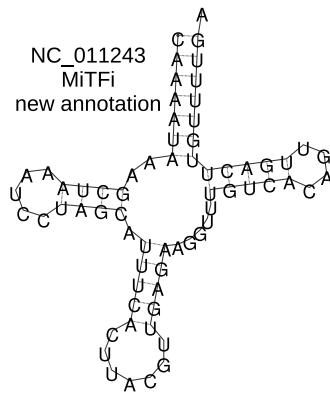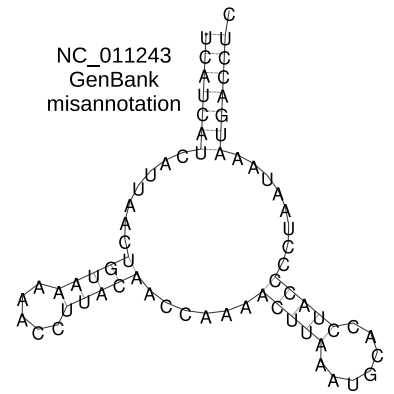

**B) Newly identified tRNA genes in mitochondrial genomes in comparison to genes of closely related organisms**

**mt-tRNA<sup>Trp</sup>**

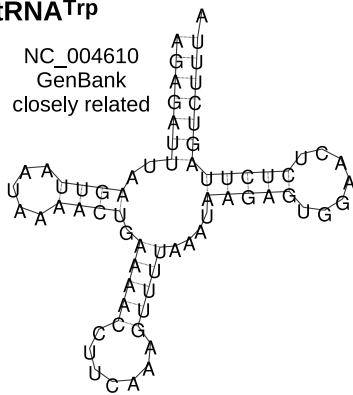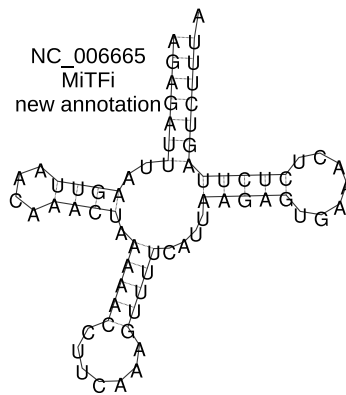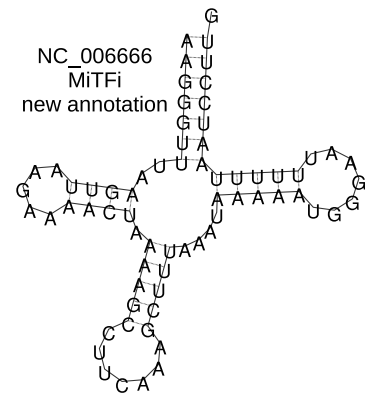

**mt-tRNA<sup>Pro</sup>**

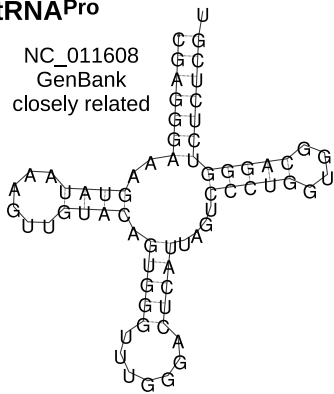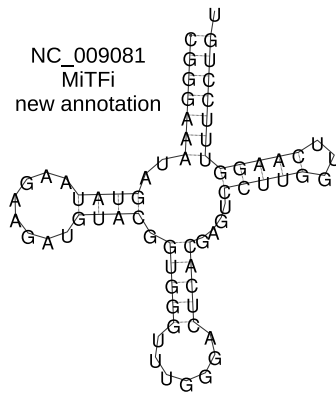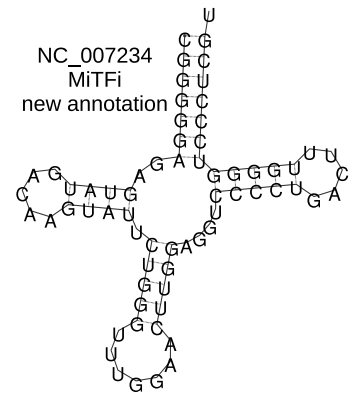

Supplementary figure 1: Examples of newly identified tRNA genes in metazoans. A) Misannotations (right), that could be corrected by MiTFi predictions (middle column)) are presented in comparison to tRNAs of closely related organisms (left). B) MiTFi hits (middle and right column) in genomes missing these tRNA genes completely in their RefSeq annotations. The corresponding tRNA gene of a closely related organism is always shown (left) to illustrate the correctness of MiTFi predictions. All examples of related genes are shown as they are annotated in the RefSeq, only the incorrect strand information of tRNA<sup>Pro</sup> in NC\_011608 was corrected.
